# Supplementary material for: In situ SERS detection of dissolved nitrate on hydrated gold substrates
Source: Royal Society of Chemistry journal article supplement (doi:10.1039/d1na00156f), 2021-01-01
Supplement: d1na00156f1.pdf [file d1na00156f1.pdf]

## Electronic Supporting Information (ESI)

### *In Situ* SERS detection of dissolved nitrate on hydrated gold substrates

Timo Küster and Geoffrey D. Bothun\*

Department of Chemical Engineering, University of Rhode Island, 2 East Alumni Ave, Kingston,  
RI, 02881 USA

Corresponding author: gbothun@uri.edu, +1-401-874-9518

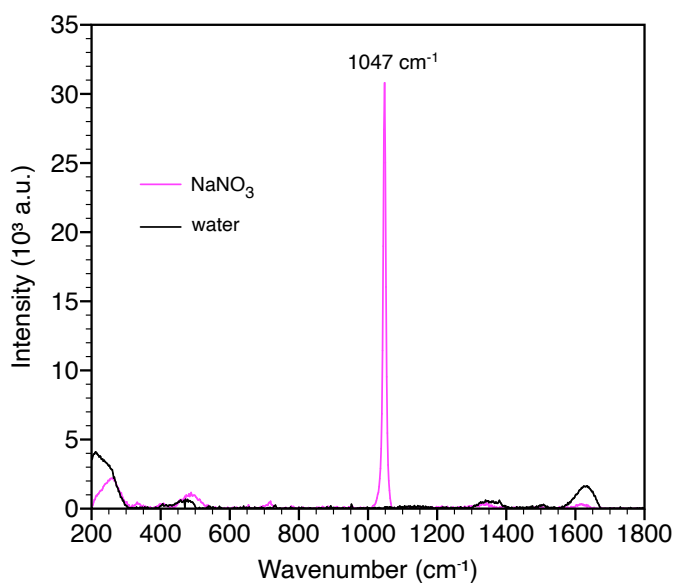

Figure S1. Raman spectra of 0.25 M NaNO<sub>3</sub> measured at room temperature with integration time of 20 s and at a laser power of 100 mW. The peak corresponding to symmetric stretching ( $\nu_1$ ) was identified at 1047 cm<sup>-1</sup> in agreement with William and Begun<sup>1</sup> for 1 M NaNO<sub>3</sub> at 25 °C.

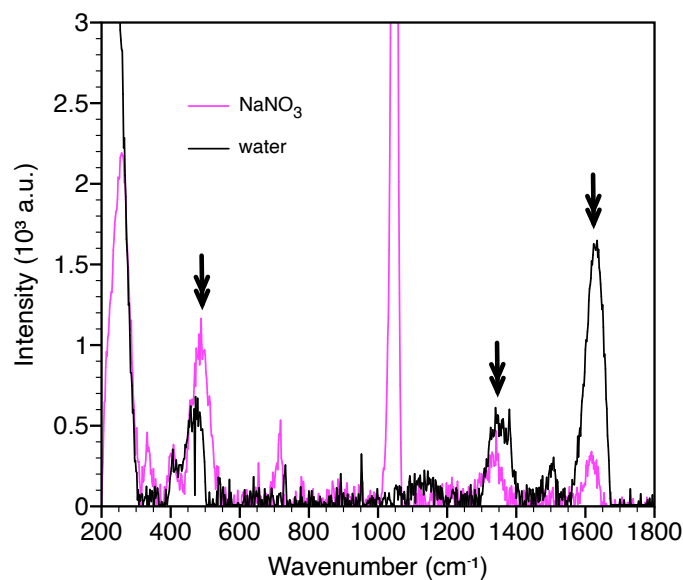

Figure S2. Magnified Raman spectra shown in Figure S1. The peak at  $480\text{ cm}^{-1}$  with a shoulder peak near  $520\text{ cm}^{-1}$  reflect a mixture of amorphous and crystalline silicon, respectively, from the glass cuvette. The peak at  $1615\text{ cm}^{-1}$  is assigned to water bending. An additional unassigned peak is observed near  $1330\text{ cm}^{-1}$  in both spectra.

## Calculations

Table S1: Fitting parameters derived for Langmuir adsorption model.  $K$  represents the Langmuir constant and  $I_{\text{sat}}$  is the intensity at the saturation concentration. The subscripts indicate the wavenumbers at which the data was evaluated.

| Processing method            | $K_{1079}\text{ (nM}^{-1}\text{)}$ | $I_{\text{sat}, 1079}$ | $R^2_{1079}$ | $K_{1332}\text{ (nM}^{-1}\text{)}$ | $I_{\text{sat}, 1332}$ | $R^2_{1332}$ |
|------------------------------|------------------------------------|------------------------|--------------|------------------------------------|------------------------|--------------|
| Baselined                    | 0.0105                             | 672.3                  | 0.74         | 0.0106                             | 1194.7                 | 0.81         |
| SNV                          | 0.0071                             | 0.4369                 | 0.94         | 0.0072                             | 0.7829                 | 0.93         |
| Si normalization (baselined) | 0.0045                             | 1.0530                 | 0.81         | 0.0047                             | 1.8537                 | 0.84         |
| Si normalization (SNV)       | 0.0057                             | 0.9591                 | 0.82         | 0.0059                             | 1.705                  | 0.85         |

The limit of detection was calculated for the SNV normalized data by calculating the intensity at the LOD (equation 5 in manuscript)

$$I_b = \underline{I_b} + 3 \cdot \sigma_b = 0.0500 + 3 * 0.0289 = 0.1367$$

and substituting I with I<sub>b</sub> in the rearranged Langmuir equation (equation 6 in manuscript) to obtain the limit of detection concentration.

$$C = \frac{I}{I_{sat} \cdot K - I \cdot K} = \frac{0.1367}{0.4369 \cdot 0.0071 \text{ nM}^{-1} - 0.1367 \cdot 0.0071 \text{ nM}^{-1}} = 64.1 \text{ nM}$$

## References

- 1 W. L. Marshall and G. M. Begun, *J. Chem. Soc., Faraday Trans. 2*, 1989, **85**, 1963–1978.
